# Supplementary material for: The effect of structural dimensionality on the electrocatalytic properties of the nickel selenide phase
Source: Royal Society of Chemistry journal article supplement (doi:10.1039/c5cp03900b), 2015-01-01
Supplement: c5cp03900b1.pdf [file c5cp03900b1.pdf]

## Supporting Information

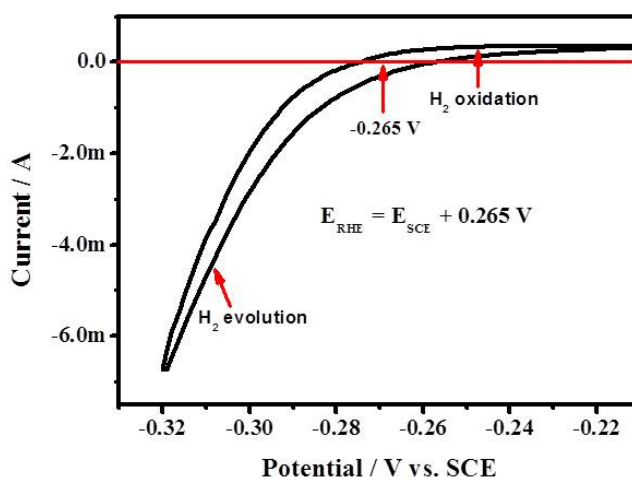

**Figure S1.** Cyclic voltammogram depicting the calibration of saturated calomel electrode with respect to RHE. Scan rate used is  $1 \text{ mV s}^{-1}$ , in presence of  $\text{H}_2$  saturated solution in  $0.5 \text{ mol L}^{-1} \text{ H}_2\text{SO}_4$ .

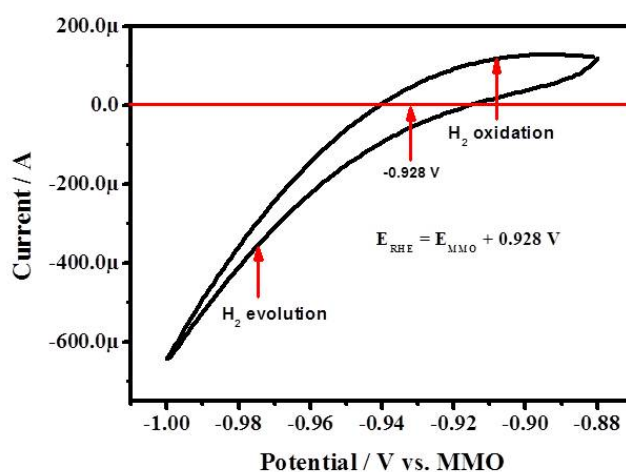

**Figure S2.** Cyclic voltammogram depicting the calibration of MMO with respect to RHE. Scan rate used is  $1 \text{ mV s}^{-1}$  in presence of  $\text{H}_2$  saturated solution in  $0.1 \text{ mol L}^{-1} \text{ KOH}$ .

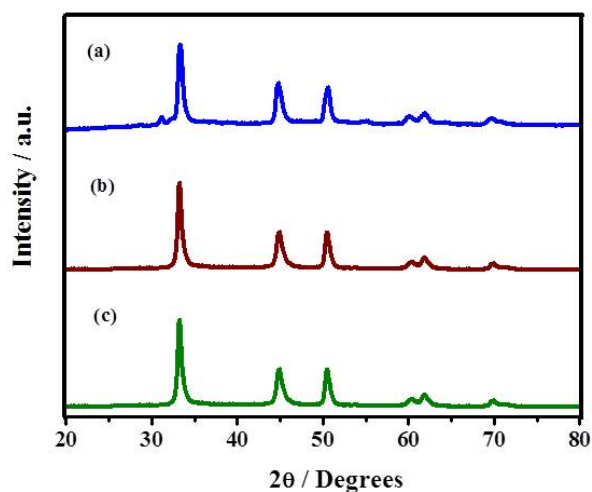

**Figure S3.** Powder X-ray diffraction patterns of NiSe wires prepared at different of reaction times at a temperature of 180°C (a) 3 h, (b) 5 h and (c) 8 h. The concentration of Ni and Se source used is 1:3 mole ratios of  $\text{NiCl}_2 \cdot 6\text{H}_2\text{O}$  and selenourea.

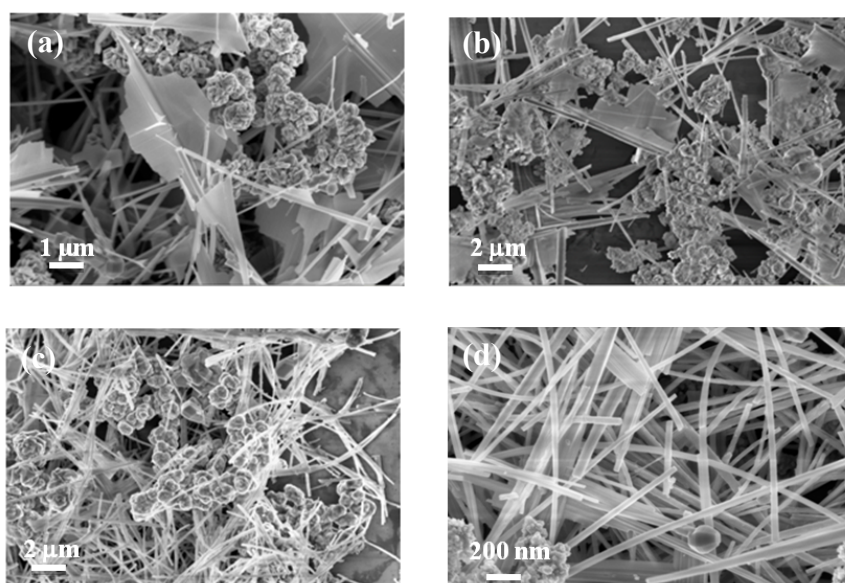

**Figure S4.** Scanning electron microscopy images of NiSe wires prepared at different reaction times of (a) 1 h, (b) 3 h, (c) 5 h and (d) 8 h. 1:3 mole ratio of  $\text{NiCl}_2 \cdot 6\text{H}_2\text{O}$  and selenourea is used at a temperature of 180°C.

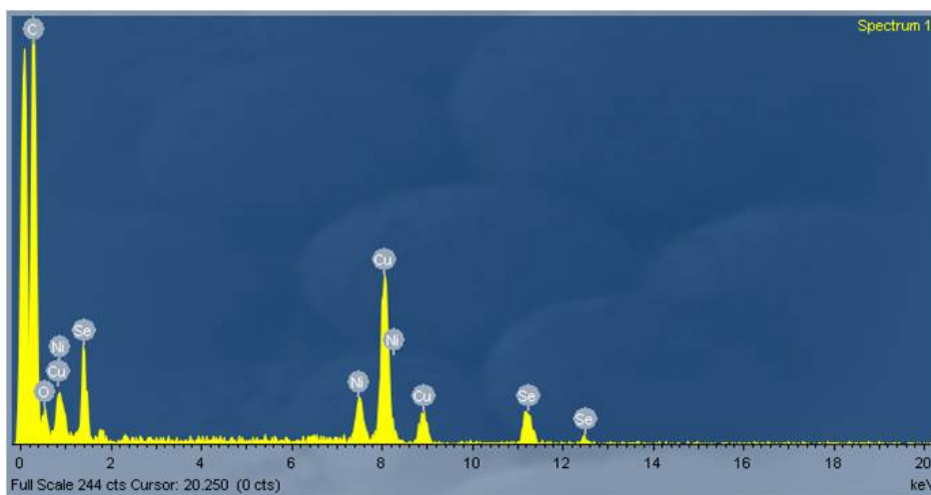

**Figure S5.** EDAX pattern of NiSe wires.

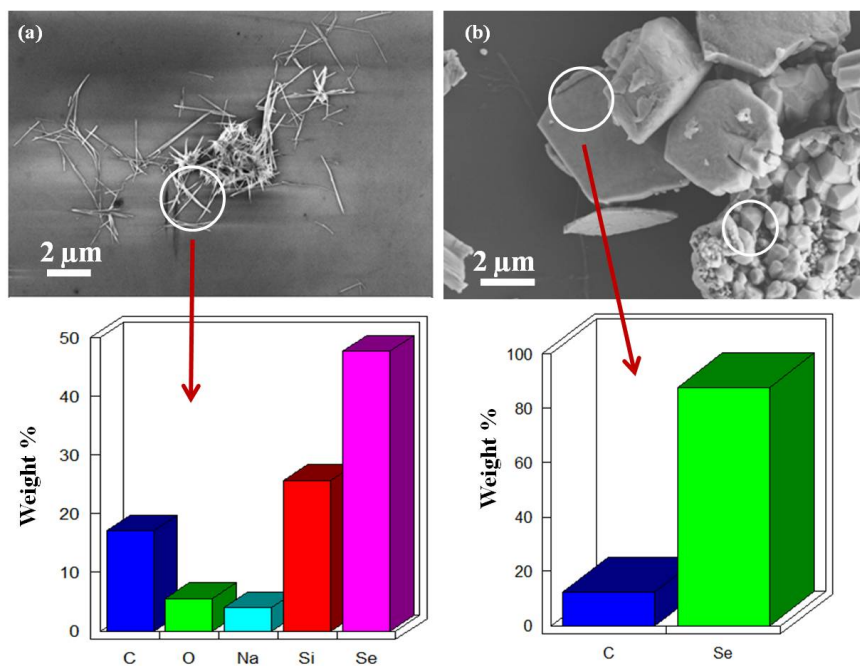

**Figure S6.** SEM images of (a) selenium wires and (b) selenium hexagons formed selenourea and KSeCN precursors in the absence of nickel salt. Temperature used is 180°C and time of reaction is maintained for 8 h.

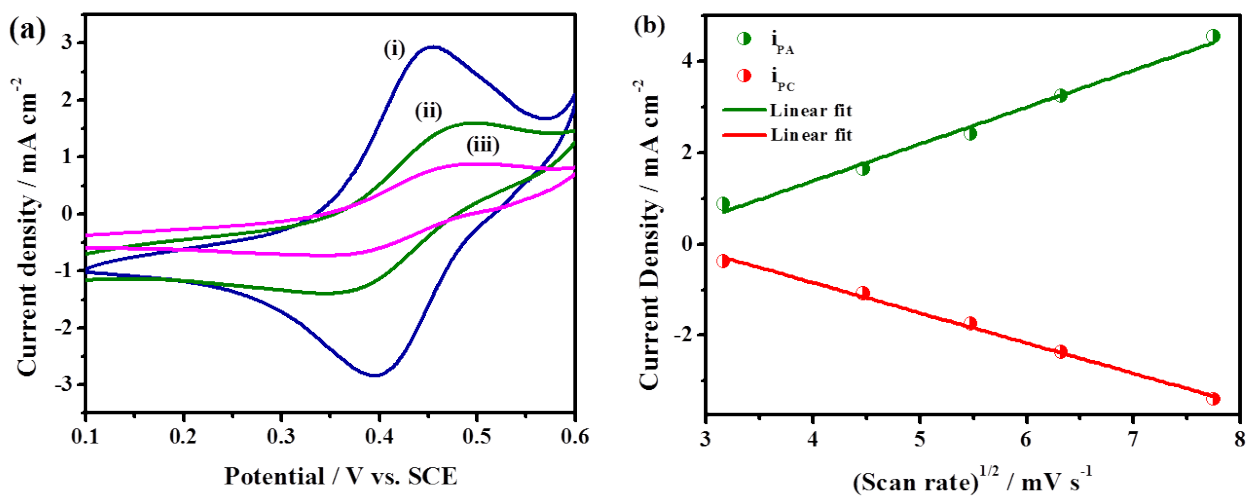

**Figure S7.** Cyclic voltammograms of 10 mmol L<sup>-1</sup> K<sub>4</sub>[Fe(CN)<sub>6</sub>] in 0.1 mol L<sup>-1</sup> KCl on (a) NiSe nanowires (i), spheres (ii) and hexagons (iii) on a modified glassy carbon electrode at a scan rate on 50 mV s<sup>-1</sup> and (b) linear relation between cathodic and anodic current density vs. (scan rate)<sup>1/2</sup> for NiSe nanowires.

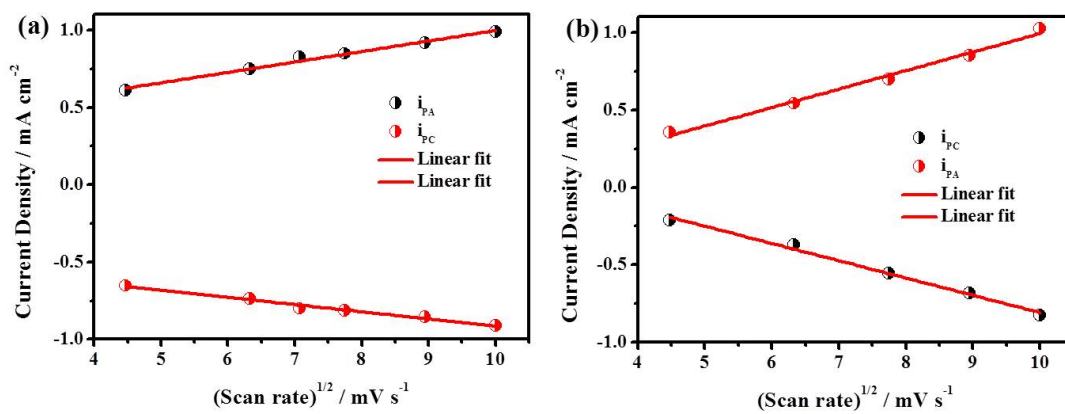

**Figure S8.** Linear relation between cathodic and anodic current density vs. (scan rate)<sup>1/2</sup> for (a) NiSe spheres and (b) hexagons.

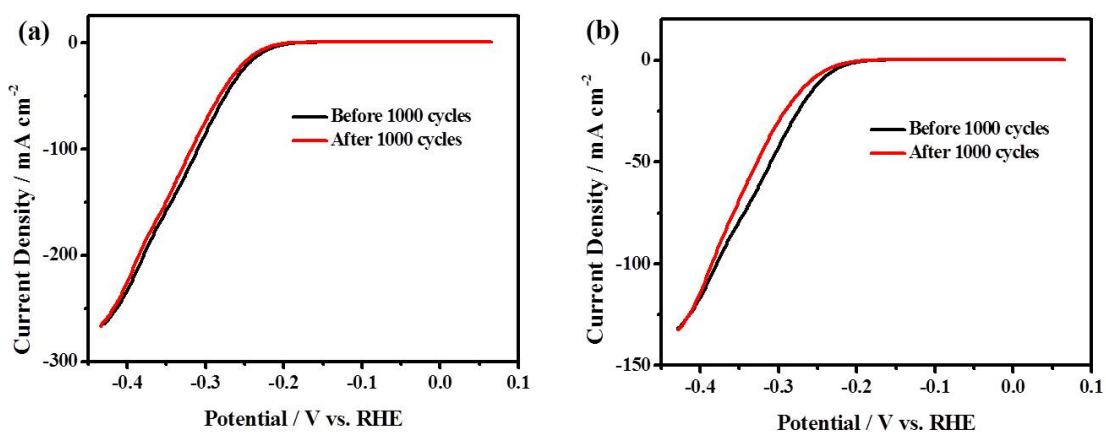

**Figure S9.** Linear sweep voltammograms for the NiSe (a) spheres and (b) hexagons before and after 1000 cycles.

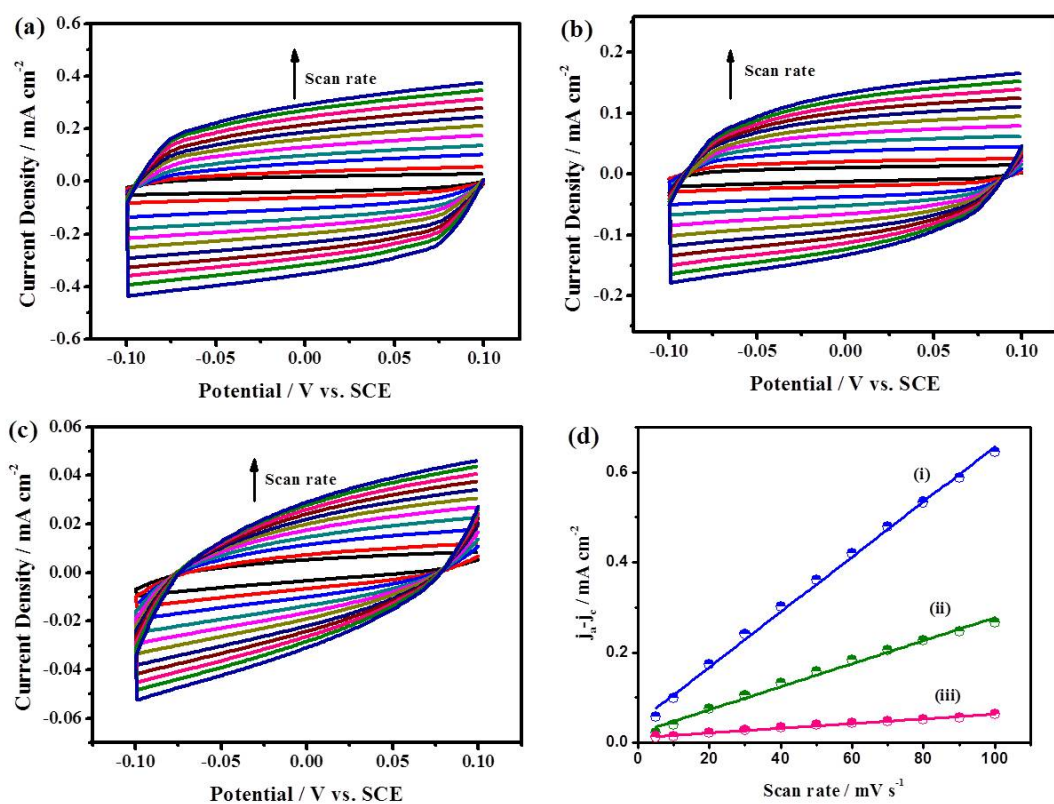

**Figure 10.** Cyclic voltammograms of (a) NiSe wires, (b) NiSe spheres and (c) NiSe hexagons in the non-faradic region in  $0.5 \text{ mol L}^{-1} \text{ H}_2\text{SO}_4$  electrolyte. (d) Scan rate dependence of voltammograms of three morphologies (i) wires, (ii) spheres and (iii) hexagons at  $0 \text{ V vs. SCE}$ .

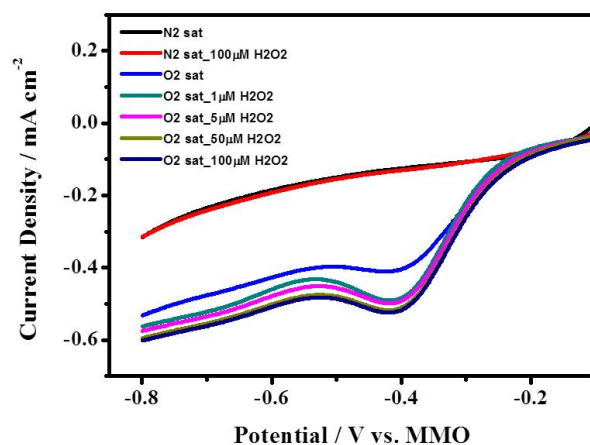

**Figure S11.** Effect of addition of  $\text{H}_2\text{O}_2$  of different concentrations ( $1 \mu\text{mol L}^{-1}$  to  $100 \mu\text{mol L}^{-1}$ ) in presence of  $\text{O}_2$  saturated  $0.1 \text{ mol L}^{-1}$  KOH solution on NiSe wire as active catalyst. Control experiments in the absence of oxygen as well as only in the presence of  $\text{O}_2$  are also given.

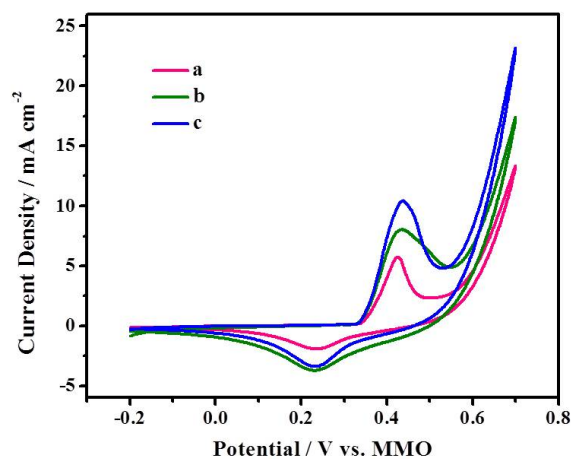

**Figure S12.** Cyclic voltammograms on NiSe nanowires (c), spheres (b) and hexagons (a) in  $0.5 \text{ mol L}^{-1}$  NaOH containing of  $0.5 \text{ mmol L}^{-1}$  glucose at a scan rate of  $20 \text{ mV s}^{-1}$ .

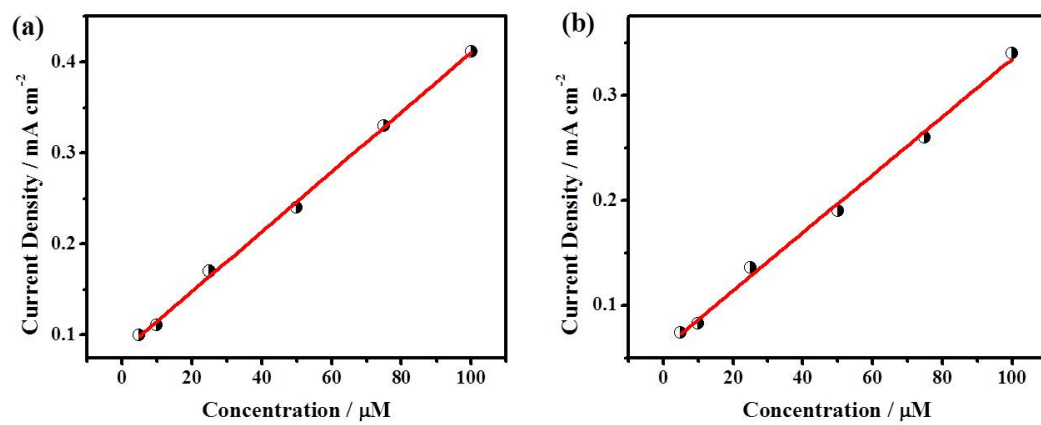

**Figure S13.** Calibration plots obtained on NiSe (a) spheres and (b) hexagons for glucose oxidation.
